# Supplementary material
Source: Springer Nature journal article supplement (https://www.springermedizin.de/resource/supplementary/12875_2005_138_MOESM1_ESM.pdf/9436500)

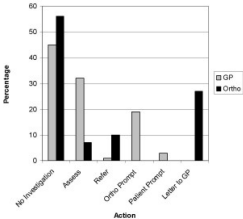

Supplement: MOESM1 [file 9436500]
